# Supplementary material for: Artificial Intelligence in Surveillance, Diagnosis, Drug Discovery and Vaccine Development against COVID-19
Source: MDPI journal article supplement (doi:10.3390/pathogens10081048), 2021-08-18
Supplement: s1 [file s1]

## Supplementary Materials

**Table S1.** AI application in Surveillance of COVID-19.

| Application                                       | Model                     | Metric Used to Evaluate Performance                                                                                    | Reference                        |
|---------------------------------------------------|---------------------------|------------------------------------------------------------------------------------------------------------------------|----------------------------------|
| AI and ML application in Surveillance of COVID-19 | AI based model            | Not Applicable                                                                                                         | Srinivasa Rao and Vazquez., 2020 |
|                                                   | ANFIS model               | Example Country: Italy<br>correlation coefficient (r) value 0.999<br>root mean square error (RMSE) value 190.81–188.18 | Ardabili et al., 2020            |
|                                                   | MLP model                 | Example Country: Italy<br>correlation coefficient (r) value 0.999<br>RMSE value 189.76–320.93                          | Ardabili et al., 2020            |
|                                                   | ANFIS Model               | Example Country: Hungary<br>mean absolute percentage error (MAPE): 38.44–39.95<br>RMSE value 248.06–119.42             | Pinter et al., 2020              |
|                                                   | Deep neural network (DNN) | RMSE<br>Confirmed 163335.65<br>Deaths 8554.55<br>Recovered 25415.03                                                    | Punn et al., 2020                |

**Table S2.** Ready-to-use AI-based models available in GitHub for diagnosing COVID-19 and predicting disease outcome.

| Model Type                  | Type of Data Retrieved from COVID-19 Positive Patients                                                                                                   | Availability                                                                                                                                            | Reference             |
|-----------------------------|----------------------------------------------------------------------------------------------------------------------------------------------------------|---------------------------------------------------------------------------------------------------------------------------------------------------------|-----------------------|
| Diagnosis of COVID-19       | Age, sex, Chest CT images with clinical symptoms (fever, cough etc.), Temperature (°C), exposure history and routine blood work data.                    | <a href="https://github.com/howchi-hlee/COVID19_CT">https://github.com/howchi-hlee/COVID19_CT</a>                                                       | (Mei et al., 2020a)   |
|                             | Chest CT and X-ray images.                                                                                                                               | <a href="https://github.com/Chen-WWWeixiang/diagnosis_covid19">https://github.com/Chen-WWWeixiang/diagnosis_covid19</a>                                 | (Jin et al., 2020)    |
|                             | Chest X-ray images.                                                                                                                                      | <a href="https://github.com/Bio-medical-Computing-UFPE/Ikonos-X-Desktop">https://github.com/Bio-medical-Computing-UFPE/Ikonos-X-Desktop</a>             | (Gomes et al., 2020)  |
|                             | Chest CT (computed tomography) images.                                                                                                                   | <a href="https://github.com/wangshuocas/COVID-19">https://github.com/wangshuocas/COVID-19</a>                                                           | (Wang et al., 2020b)  |
| COVID-19 outcome prediction | Data retrieved from Kaggle, containing geographical location, travel history, clinical, and demographic data.                                            | <a href="https://github.com/Atharva-Peshkar/Covid-19-Patient-Health-Analytics">https://github.com/Atharva-Peshkar/Covid-19-Patient-Health-Analytics</a> | (Iwendi et al., 2020) |
|                             | Age, sex, ethnicity, encounter type (inpatient/other), body temperature, blood pressure, oxygen saturation, smoking habit, and any pre-existing disease. | <a href="https://github.com/SBCNY/Clinical-predictors-of-COVID-19-mortality">https://github.com/SBCNY/Clinical-predictors-of-COVID-19-mortality</a>     | (Yadaw et al., 2020)  |
|                             | Age, sex, epidemiological history, initial symptoms, outcomes (survival/mortality), laboratory test results.                                             | <a href="https://github.com/HAIRLAB/Pre_Surv_COVID_19">https://github.com/HAIRLAB/Pre_Surv_COVID_19</a>                                                 | (Yan et al., 2020)    |

**Table S3.** The application of AI-based models used in COVID-19 drug discovery.

| Drug                                                       | Target                        | Algorithm                                                                        | Other Details                                                                                          | Reference          |
|------------------------------------------------------------|-------------------------------|----------------------------------------------------------------------------------|--------------------------------------------------------------------------------------------------------|--------------------|
| Atazanavir                                                 | SARS-CoV-2 3C-like proteinase | Deep learning-based model -Molecule Transformer-Drug Target Interaction (MT-DTI) | Kd ~94.94 nM<br>May also act on RNA-dependent RNA polymerase and other SARS-CoV-2 replication proteins | Beck et al., 2020  |
| Remdesivir                                                 | SARS-CoV-2 3C-like proteinase | MT-DTI                                                                           | Kd ~113.13 nM                                                                                          | Beck et al., 2020  |
| Efavirenz                                                  | SARS-CoV-2 3C-like proteinase | MT-DTI                                                                           | Kd ~199.17 nM                                                                                          | Beck et al., 2020  |
| Ritonavir                                                  | SARS-CoV-2 3C-like proteinase | MT-DTI                                                                           | Kd ~204.05 nM                                                                                          | Beck et al., 2020  |
| Elbasvir                                                   | NS5A inhibitor                | DeepCE model                                                                     | Approved drug for Hepatitis C                                                                          | Pham et al., 2021  |
| Pibrentasvir                                               | NS5A inhibitor                | DeepCE model                                                                     | Approved drug for Hepatitis C                                                                          | Pham et al., 2021  |
| Velpatasvir                                                | NS5A inhibitor                | DeepCE model                                                                     | Approved drug for Hepatitis C                                                                          | Pham et al., 2021  |
| Ruzasvir                                                   | NS5A inhibitor                | DeepCE model                                                                     | Investigational drug for Hepatitis C                                                                   | Pham et al., 2021  |
| Samatasvir                                                 | NS5A inhibitor                | DeepCE model                                                                     | Investigational drug for Hepatitis C                                                                   | Pham et al., 2021  |
| Odalasvir                                                  | NS5A inhibitor                | DeepCE model                                                                     | Investigational drug for Hepatitis C                                                                   | Pham et al., 2021  |
| Coblopassvir                                               | NS5A inhibitor                | DeepCE model                                                                     | Investigational drug for Hepatitis C                                                                   | Pham et al., 2021  |
| Baloxavir Marboxil                                         |                               | DeepCE model                                                                     | Approved drug for Influenza A and B                                                                    | Pham et al., 2021  |
| Metocurine                                                 |                               | DeepCE model                                                                     | Approved muscle relaxant                                                                               | Pham et al., 2021  |
| Dactinomycin                                               |                               | DeepCE model                                                                     | Approved drug for Cancer                                                                               | Pham et al., 2021  |
| C998-0189                                                  | SARS-CoV-2 3C-like protease   | Densely Fully Connected Neural Network (DFCNN) model                             | Compound from ChemDiv dataset<br>Vina score (kcal/mol) – 8.5                                           | Zhang et al., 2020 |
| C998-0948                                                  | SARS-CoV-2 3C-like protease   | DFCNN model                                                                      | Compound from ChemDiv dataset<br>Vina score (kcal/mol) – 7.7                                           | Zhang et al., 2020 |
| C998-1046                                                  | SARS-CoV-2 3C-like protease   | DFCNN model                                                                      | Compound from ChemDiv dataset<br>Vina score (kcal/mol) – 7.6                                           | Zhang et al., 2020 |
| Meglumine                                                  |                               | DFCNN model                                                                      | Targetmol-Approved Drug library candidate<br>DFCNN Score $\geq 0.999$                                  | Zhang et al., 2020 |
| Vidarabine                                                 |                               | DFCNN model                                                                      | Targetmol-Approved Drug library candidate<br>DFCNN Score $\geq 0.999$                                  | Zhang et al., 2020 |
| Ganciclovir                                                |                               | DFCNN model                                                                      | Targetmol-Approved Drug library candidate<br>DFCNN Score $\geq 0.999$                                  | Zhang et al., 2020 |
| Tripeptide (combination of isoleucine, lysine and proline) | SARS-CoV-2 3C-like protease   | DFCNN model                                                                      | DFCNN score $\geq 0.997$                                                                               | Zhang et al., 2020 |
